# Supplementary material for: Altered Local Interactions and Long-Range Communications in UK Variant (B.1.1.7) Spike Glycoprotein
Source: MDPI journal article supplement (doi:10.3390/ijms22115464), 2021-05-22
Supplement: s1 [file s1]

# Altered Local Interactions and Long-range Communications in UK Variant (B.1.1.7) Spike Glycoprotein

Stefano Borocci<sup>1,2</sup>, Carmen Cerchia<sup>3</sup>, Alessandro Grottesi<sup>4</sup>, Nico Sanna<sup>1</sup>, Ingrid Guarnetti Prandi<sup>5</sup>, Nabil Abid<sup>6,7</sup>, Andrea R. Beccari<sup>9</sup>, Giovanni Chillemi<sup>1,8,\*</sup>, Carmine Talarico<sup>9,\*</sup>

<sup>1</sup> Department for Innovation in Biological, Agro-food and Forest systems, DIBAF, University of Tuscia, via S. Camillo de Lellis s.n.c., 01100 Viterbo, Italy; borocci@unitus.it (S.B.); n.sanna@unitus.it (N.S.); [gchillemi@unitus.it](mailto:gchillemi@unitus.it) (G.C.)

<sup>2</sup> Institute for Biological Systems, ISB, CNR, Via Salaria, Km 29.500, 00015 Monterotondo, Rome 00015, Italy

<sup>3</sup> Department of Pharmacy, University of Napoli "Federico II", via D. Montesano 49, 80131 Napoli, Italy; [carmen.cerchia@unina.it](mailto:carmen.cerchia@unina.it) (C.C.)

<sup>4</sup> Department HPC, CINECA, via dei Tizii 6, 00185 Roma, Italy; a.grottesi@ Cineca.it (A.G.)

<sup>5</sup> Department of Chemistry and Industrial Chemistry, University of Pisa, via Giuseppe Moruzzi 3, I-56124 Pisa, Italy; [ingrid.prandi@gmail.com](mailto:ingrid.prandi@gmail.com) (I.G.P.)

<sup>6</sup> Laboratory of Transmissible Diseases and Biological Active Substances LR99ES27, Faculty of Pharmacy, University of Monastir, Rue Ibn Sina, 5000, Monastir, Tunisia; [nabilabidbensalem.2014@yahoo.fr](mailto:nabilabidbensalem.2014@yahoo.fr) (N.A)

<sup>7</sup> High Institute of Biotechnology of Sidi Thabet, Department of Biotechnology, University of Manouba, BP-66, 2020, Ariana-Tunis, Tunisia

<sup>8</sup> Institute of Biomembranes, Bioenergetics and Molecular Biotechnologies, IBIOM, CNR, Via Giovanni Amendola, 122/O, 70126, Bari, Italy

<sup>9</sup> Dompé Farmaceutici SpA, via Campo di Pile, 67100 L'Aquila, Italy; [carmine.talarico@dompe.com](mailto:carmine.talarico@dompe.com) (C.T.); [andrea.beccari@dompe.com](mailto:andrea.beccari@dompe.com) (A.R.B.)

\* Correspondence: [gchillemi@unitus.it](mailto:gchillemi@unitus.it) (G.C.); [Carmine.Talarico@dompe.com](mailto:Carmine.Talarico@dompe.com) (C.T.)

## Phylogeny

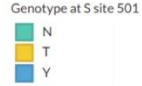

Frequencies (colored by Genotype at S pos 501)

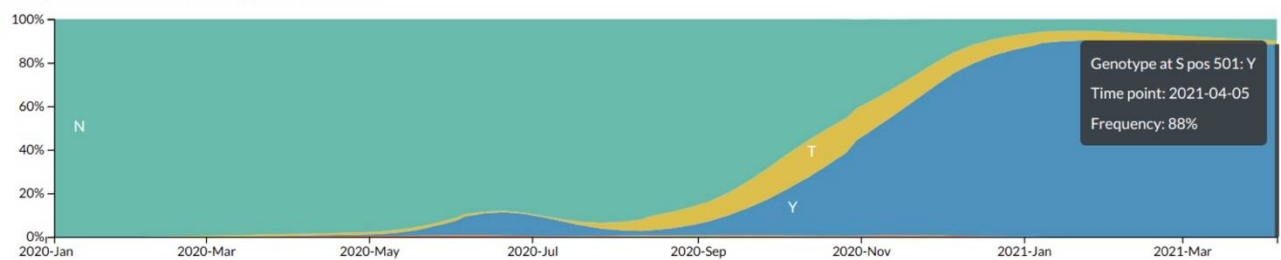

**B**

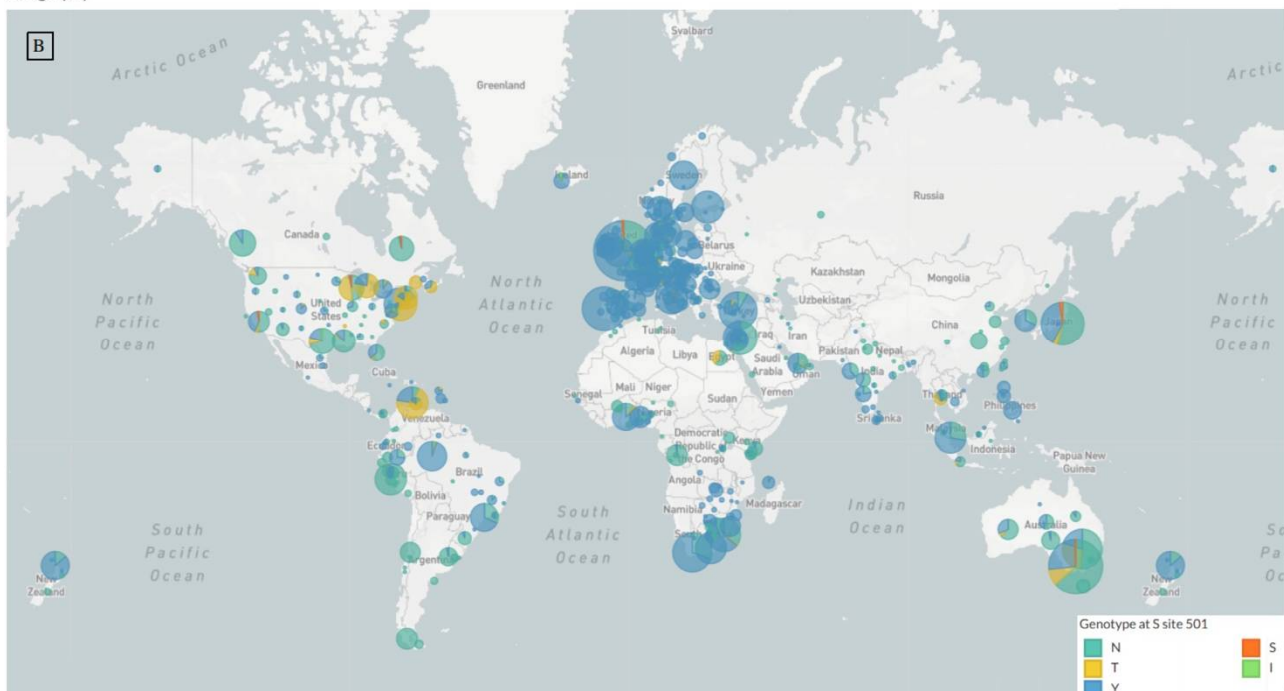

**Figure S2.** The site of mutations in VOC 202012/01 S protein (see Figure 1B) are shown as licorice in chain B (up conformation) of the WT (MD snapshot after 629.8 ns of MD simulation, centroid of the most populated protein cluster). A) The three residues deleted in VOC 202012/01 are in NTD (orange). S982 is one of the three mutation sites in the S2 region. B) A570 and D614 are in the region between RBD and the furin-like cleavage site. P681 is the first residue of the PRRAR cleavage sequence. The other two mutation sites in S2, T716 and D1118, are also shown. C) N501 is the only mutation located in RBD, particularly in RBM.

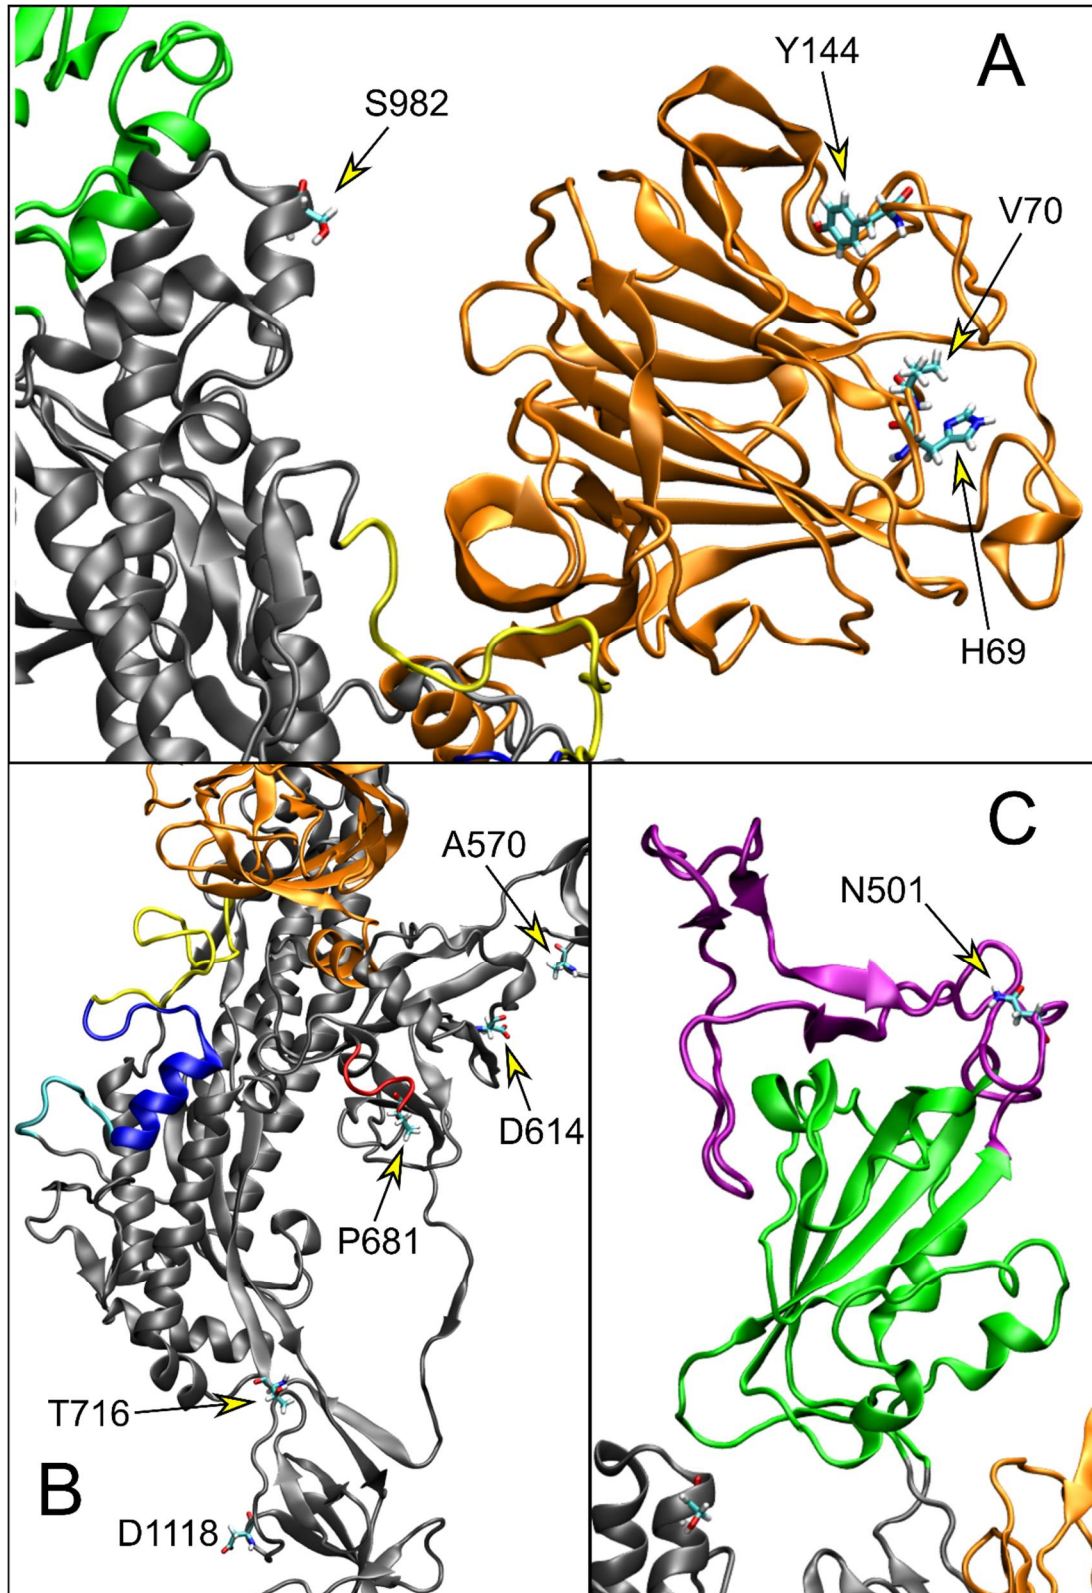

**Figure S3.** Per-residue RMSF in SARS-CoV-2 WT unglycosylated S protein MD simulation, as described in Tagliamonte and coauthors [1]. In this case, monomer 1 (blue line) is in up conformation.

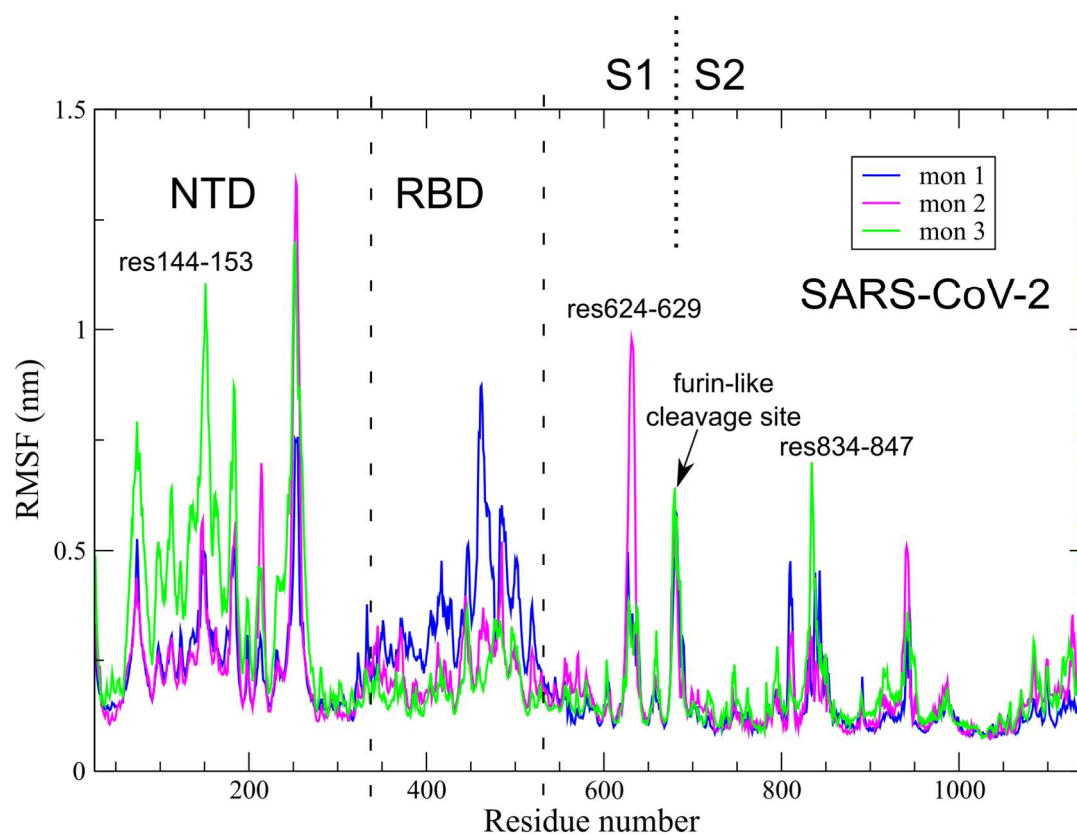

**Table S1.** Direct protein-protein hydrogen bonds recurring for more than 80% of simulation time involving residues site of UK mutations (gray background) in WT S glycoprotein.

| Donor Residue | Donor atom | Donor Monomer | Acceptor residue | Acceptor atom | Acceptor Monomer | % residence time |
|---------------|------------|---------------|------------------|---------------|------------------|------------------|
| GLY72         | N          | 1             | HIS69            | O             | 1                | 100.0            |
| TYR248        | OH         | 1             | HIS69            | ND1           | 1                | 95.8             |
| SER71         | N          | 2             | HIS69            | ND1           | 2                | 87.5             |
| GLY72         | N          | 2             | HIS69            | O             | 2                | 91.7             |
| SER71         | OG         | 3             | HIS69            | ND1           | 3                | 94.8             |
| GLY72         | N          | 1             | VAL70            | O             | 1                | 95.8             |
| TYR144        | N          | 2             | GLY142           | O             | 2                | 100.0            |
| TYR144        | OH         | 2             | ASN121           | O             | 2                | 93.8             |
| TYR144        | OH         | 2             | VAL159           | O             | 2                | 93.8             |
| GLN498        | NE2        | 2             | ASN501           | ND2           | 2                | 90.6             |
| ASN501        | ND2        | 2             | GLN498           | OE1           | 2                | 95.8             |
| GLN506        | NE2        | 2             | ASN501           | O             | 2                | 81.3             |
| GLY502        | N          | 3             | ASN501           | OD1           | 3                | 97.9             |
| GLN506        | NE2        | 3             | ASN501           | O             | 3                | 100.0            |
| ASP614        | N          | 1             | ALA647           | O             | 1                | 96.9             |
| THR859        | OG1        | 2             | ASP614           | OD1           | 1                | 87.5             |
| SER982        | OG         | 1             | THR547           | OG1           | 3                | 84.4             |
| THR547        | OG1        | 2             | SER982           | OG            | 3                | 95.8             |
| SER982        | N          | 2             | ASP979           | O             | 2                | 87.5             |
| SER982        | OG         | 2             | GLY545           | O             | 1                | 88.5             |
| SER982        | OG         | 2             | ASN978           | O             | 2                | 99.0             |
| ARG1091       | NH1        | 1             | ASP1118          | O             | 1                | 99.0             |
| ARG1091       | NH1        | 1             | ASP1118          | OD2           | 2                | 100.0            |
| ARG1091       | NH1        | 2             | ASP1118          | OD1           | 2                | 99.0             |
| ARG1091       | NH1        | 2             | ASP1118          | O             | 2                | 97.9             |
| THR1116       | OG1        | 2             | ASP1118          | OD1           | 2                | 91.7             |
| THR1116       | OG1        | 2             | ASP1118          | OD2           | 2                | 90.6             |



**Table S2.** Direct protein-protein hydrogen bonds recurring for more than 80% of simulation time involving mutated residues in UK S glycoprotein.

| <b>Donor Residue</b> | <b>Donor atom</b> | <b>Donor Monomer</b> | <b>Acceptor residue</b> | <b>Acceptor atom</b> | <b>Acceptor Monomer</b> | <b>% residence time</b> |
|----------------------|-------------------|----------------------|-------------------------|----------------------|-------------------------|-------------------------|
| GLN498               | NE2               | 2                    | TYR501                  | OH                   | 2                       | 92.7                    |
| TYR449               | OH                | 3                    | TYR501                  | OH                   | 3                       | 99.0                    |
| THR572               | N                 | 1                    | ASP570                  | OD2                  | 1                       | 96.9                    |
| THR572               | OG1               | 1                    | ASP570                  | O                    | 1                       | 87.5                    |
| SER967               | OG                | 2                    | ASP570                  | O                    | 1                       | 97.9                    |
| THR572               | N                 | 3                    | ASP570                  | OD1                  | 3                       | 97.9                    |
| THR572               | N                 | 3                    | ASP570                  | OD2                  | 3                       | 89.6                    |
| LYS854               | NZ                | 3                    | ASP570                  | OD2                  | 2                       | 94.8                    |
| GLN607               | NE2               | 1                    | HIS681                  | O                    | 1                       | 99.0                    |
| ALA684               | N                 | 2                    | HIS681                  | O                    | 2                       | 87.5                    |
| SER673               | OG                | 3                    | HIS681                  | ND1                  | 3                       | 90.6                    |
| THR676               | OG1               | 3                    | HIS681                  | O                    | 3                       | 89.6                    |
| ASN717               | ND2               | 3                    | ILE716                  | O                    | 3                       | 100.0                   |
| ARG1091              | NH1               | 1                    | HIS1118                 | O                    | 2                       | 92.7                    |
| ARG1091              | NH2               | 1                    | HIS1118                 | O                    | 1                       | 97.9                    |
| ARG1091              | NH2               | 1                    | HIS1118                 | O                    | 2                       | 99.0                    |
| ARG1091              | NH2               | 2                    | HIS1118                 | O                    | 3                       | 100.0                   |
| HIS1118              | NE2               | 2                    | HIS1118                 | ND1                  | 1                       | 92.7                    |
| THR1116              | OG1               | 3                    | HIS1118                 | N                    | 3                       | 91.7                    |

**Table S3.** Occupancy (% residence time) of the main hydrogen bonds between the glycan linked to N165, N122 and N149 of monomer 3 and the amino acids of RBD of monomer 2 in up conformation in the S protein WT. For the glycan at N234 (monomer 3), the occupancy of the intra-monomer hydrogen bonds with the amino acids of the RBD (monomer 3) are reported.

| Glycan | Residue | % residence time |
|--------|---------|------------------|
| N122   | THR333  | 6.9              |
|        | ASN334  | 32.9             |
|        | LEU335  | 26.0             |
|        | CYS336  | 2.2              |
|        | PRO337  | 2.9              |
|        | GLU340  | 31.0             |
| N149   | GLU340  | 74.9             |
|        | PHE342  | 2.2              |
|        | ASN343  | 100.0            |
|        | ALA344  | 10.4             |
|        | THR345  | 72.0             |
|        | ARG346  | 14.5             |
|        | ARG509  | 3.0              |
| N165   | ARG357  | 34.96            |
|        | ASN394  | 15.3             |
|        | LYS462  | 17.2             |
|        | GLU465  | 12.15            |
|        | GLU516  | 81.8             |
|        | LEU517  | 7.7              |
|        | LEU518  | 2.4              |
|        | HIS519  | 15.9             |
| N234   | SER366* | 2.9              |
|        | TYR369* | 71.8             |
|        | ASN370* | 40.1             |
|        | THR385* | 71.5             |
|        | ASN388* | 89.9             |
|        | ASP389* | 100.0            |
|        | LYS528* | 16.1             |

\*Amino acids of RBD domain of monomer 3

**Table S4.** Occupancy (% residence time) of the hydrogen bonds between the glycan at N165 and N234 of the monomer 2 and between the glycans linked to N122 and N149 of the monomer 3 and the glycan at N331 and N343 of monomer 2 (up conformation).

| Glycan pairs                         | % residence time |      |
|--------------------------------------|------------------|------|
|                                      | WT               | UK   |
| N165 <sup>a</sup> -N234 <sup>a</sup> | 83.4             | 97.0 |
| N122 <sup>a</sup> -N331 <sup>b</sup> | 94.5             | 87.0 |
| N122 <sup>a</sup> -N343 <sup>b</sup> | 50.4             | 96.9 |
| N149 <sup>a</sup> -N331 <sup>b</sup> | 1.3              | 0    |
| N149 <sup>a</sup> -N343 <sup>b</sup> | 32.1             | 97.3 |

<sup>a</sup> monomer 2

<sup>b</sup> monomer 3

**Table S5.** Occupancy (% residence time) of the hydrogen bonds between the glycan linked to N122, N149, N165 and N234 of the monomer 3 and the amino acids of RBD domains of monomer 2 (up conformation) and monomer 3.

| Glycan-RBD pairs             | % residence time |       |
|------------------------------|------------------|-------|
|                              | WT               | UK    |
| N122-RBD <sub>2</sub> ("up") | 55.0             | 19.5  |
| N149-RBD <sub>2</sub> ("up") | 93.9             | 0.0   |
| N165-RBD <sub>2</sub> ("up") | 96.7             | 14.64 |
| N165-RBD <sub>3</sub>        | 79.2             | 10.2  |
| N234-RBD <sub>3</sub>        | 99.8             | 98.2  |

**Table S6.** Occupancy (% residence time) of the main hydrogen bonds between the glycan linked to N165 and N122 of monomer 3 and the amino acids of RBD of monomer 2 in up conformation in the S protein UK. For the glycan at N234 (monomer 3), the occupancy of the intra-monomer hydrogen bonds with the amino acids of the RBD (monomer 3) are reported.

| Glycan | Residue | % residence time |
|--------|---------|------------------|
| N122   | THR333  | 4.8              |
|        | ASN334  | 3.6              |
|        | LEU335  | 5.0              |
|        | GLU339  | 11.0             |
| N165   | ARG357  | 9.2              |
|        | ASN396  | 4.0              |
| N234   | ASP361* | 68.7             |
|        | THR362* | 6.3              |
|        | SER363* | 9.2              |
|        | TYR366* | 29.7             |
|        | THR382* | 29.0             |
|        | ASN385* | 19.4             |
|        | ASP386* | 78.7             |
|        | LYS525* | 12.9             |
|        | LYS526* | 12.9             |

\*Amino acids of RBD domain of monomer 3



**Table S7.** Site specific glycosylation in the model of SARS-CoV-2 S protein WT and UK mutant.

| <b>Residue</b> | <b>Monomer 1</b>      | <b>Monomer 2<br/>("up")</b> | <b>Monomer 3</b>      |
|----------------|-----------------------|-----------------------------|-----------------------|
| N61            | M5                    | M5                          | M5                    |
| N74            | A3                    | FA3G3S2                     | A2                    |
| N122           | M5                    | FA2                         | M5                    |
| N149           | FA2G2S1               | FA3                         | FA2                   |
| N165           | FA2G2S2               | M5                          | FA2G2S1               |
| N234           | M8                    | M9                          | M9                    |
| N282           | FA3                   | FA3G3S1                     | A2                    |
| N331           | FA2                   | FA2                         | FA3G3S1               |
| N343           | FA2                   | FA1                         | FA2                   |
| N603           | FA2                   | M5                          | M5                    |
| N616           | A2                    | FA2                         | FA2                   |
| N657           | M5                    | Hybrid G1                   | Hybrid G1             |
| N709           | M6                    | M5                          | M5                    |
| N717           | Hybrid G1             | M5                          | M6                    |
| N801           | M6                    | M7                          | M5                    |
| N1074          | FA2G2S1               | M5                          | M5                    |
| N1098          | FA2                   | A2                          | Hybrid G1S1           |
| N1134          | FA1                   | FA3                         | FA2                   |
| T323           | O-glycan <sup>a</sup> | O-glycan <sup>b</sup>       | O-glycan <sup>c</sup> |
| S325           | O-glycan <sup>a</sup> |                             |                       |

<sup>a</sup> DNeu5Aca2-3DGalb1-3DGalNAca1-OH

<sup>b</sup> DNeu5Aca2-3DGalb1-3[DNeu5Aca2-6]DGalNAca1-OH

<sup>c</sup> DGalb1-3DGalNAca1-OH

## References

1. Tagliamonte, M.S.; Abid, N.; Borocci, S.; Sangiovanni, E.; Ostrov, D.A.; Kosakovsky Pond, S.L.; Salemi, M.; Chillemi, G.; Mavian, C. Multiple recombination events and strong purifying selection at the origin of SARS-CoV-2 spike glycoprotein increased correlated dynamic movements. *Int. J. Mol. Sci.* **2021**, *22*, 1–16.
