# Supplementary material for: Altered Local Interactions and Long-Range Communications in UK Variant (B.1.1.7) Spike Glycoprotein
Source: MDPI journal article supplement (doi:10.3390/ijms22115464), 2021-05-22
Supplement: s1 [file s1]

## **Supplementary movies**

**Movie 1.** Comparison of essential dynamics motion along eigenvector 1 for WT and UK. Domain colors as in in Figure 1A. The most correlated motions involve the RBD and the FPPR (see Figure 3).

**Movies 2-3.** Essential dynamics motion along eigenvector 2 for WT and UK, respectively. Correlated motions along this eigenvector highlight a network of interactions between distant protein key regions in both systems (see Figure 4).
