# Supplementary material for: Altered Local Interactions and Long-Range Communications in UK Variant (B.1.1.7) Spike Glycoprotein
Source: Int J Mol Sci. 2021 May 22;22(11):5464. doi: 10.3390/ijms22115464 (PMC8196891; doi:10.3390/ijms22115464)
Supplement: Supplementary file 1 [file ijms-22-05464-s001.zip]

Archive with 15 entries (12 files):
- Supplementary_Materials/
- Supplementary_Materials/.DS_Store
- Supplementary_Materials/Movies_Legend.pdf
- Supplementary_Materials/movie_1.gif
- Supplementary_Materials/movie_2.gif
- Supplementary_Materials/movie_3.gif
- Supplementary_Materials/Supplementary Materials.pdf
- __MACOSX/
- __MACOSX/Supplementary_Materials/
- __MACOSX/Supplementary_Materials/._.DS_Store
- __MACOSX/Supplementary_Materials/._Movies_Legend.pdf
- __MACOSX/Supplementary_Materials/._movie_1.gif
- __MACOSX/Supplementary_Materials/._movie_2.gif
- __MACOSX/Supplementary_Materials/._movie_3.gif
- __MACOSX/Supplementary_Materials/._Supplementary Materials.docx
